# Supplementary material for: Estimating the extent of Antarctic summer sea ice during the Heroic Age of Antarctic Exploration
Source: Copernicus journal article supplement (doi:10.5194/tc-10-2721-2016), 2016-11-21
Supplement: Supplementary file 1 [file ice_edge_points.xlsx]

## Sheet: Sheet1
Expedition	Day	Month	Year	Entry Time UTC	Latitude	Longitude	Entry text
Endurance	10	12	1914	2100	-58.89	-19.84	Entered very loose pack ice about 11.10 of previous day
Scotia	2	2	1903	400	-60.04	-43.44	At edge of pack. Struck first piece of ice
Scotia	2	2	1903	1100	-60.31	-43.59	Coasting along pack
Scotia	3	2	1903	1600	-60.39	-44.04	In open water.
Scotia	4	2	1903	200	-60.49	-44.4	In open water, between land and pack ice.
Scotia	4	2	1903	1600	-60.64	-44.82	Among loose ice, steaming.
Scotia	5	2	1903	2300	-60.79	-43.31	Clear of Pack
Scotia	6	2	1903	700	-60.48	-42.94	Steaming along edge of pack.
Scotia	8	2	1903	900	-59.8	-37.34	Sailing through loose ice.
Scotia	9	2	1903	200	-59.71	-35.44	Sailing and steaming through pack since 2am
Scotia	14	2	1903	1100	-59.57	-28.01	Sailing along edge of pack.
Scotia	15	2	1903	1100	-61.36	-26.35	In open water.
Scotia	19	2	1903	2000	-68.82	-24.13	N.E. swell small granular.
Scotia	1	3	1903	100	-69.22	-27.26	Sailing in open water near edge of pack.
Scotia	4	3	1903	2000	-68.32	-33	In open water.
Scotia	5	3	1903	700	-68.24	-33.78	Steaming along pack. No bergs in sight.
Scotia	6	3	1903	100	-67.94	-35.15	Steaming along edge of pack.
Scotia	10	3	1903	900	-66.79	-40.18	In open water.
Scotia	10	3	1903	2000	-66.61	-40.94	In pancake ice.
Scotia	11	3	1903	1300	-66.4	-42.18	Pancake ice and open water.
Scotia	19	3	1903	100	-61.84	-41.64	In open water with a few pieces of ice.
Scotia	19	3	1903	1500	-61.37	-42.08	In open water.
Scotia	26	2	1904	900	-65.67	-33.6	Passing through stream pack ice, more ahead.
Scotia	26	2	1904	1200	-65.85	-33.3	Streams of pack on all sides.
Scotia	26	2	1904	2200	-66.13	-32.54	Loose streams of pack.
Scotia	27	2	1904	0	-66.17	-32.4	Clear of pack. Moon and starts shining.
Scotia	27	2	1904	200	-66.21	-32.26	In loose pack. Slight S. W. swell. Moon and stars shining.
Scotia	28	2	1904	1300	-66.35	-28.62	Very scattered pack. Swell from N.
Scotia	29	2	1904	1000	-67.83	-27.39	No Ice.
Scotia	1	3	1904	100	-68.4	-25.83	Stream ice.
Scotia	1	3	1904	1100	-68.65	-24.61	Steaming through loose pack. Swell NE X N
Scotia	2	3	1904	500	-70.19	-23.58	No ice in sight.
Scotia	3	3	1904	700	-71.98	-19.33	Only 1 flat topped berg. No other ice.
Scotia	5	3	1904	700	-72.48	-18.8	Pack edge lying to W.S.W. 1/2 mile away.
Scotia	15	3	1904	600	-73.18	-23.88	No ice of any kind in sight.
Nimrod	16	1	1908	1030	-67.0775	-179.239	From 22.30. ship passing through small ice
Nimrod	20	12	1908	2000	-66.15	-178.49	08.00; in brash and rotten ice.
Nimrod	9	3	1909	2400	-67.83	168.83	In new ice.
Terra Nova (10-13)	9	12	1910	1900	-66.545	-179.322	7 h. : Entered loose pack.
Terra Nova (10-13)	5	3	1911	800	-66.88	161.14	20 h. : Surface of sea just frozen.
Aurora (14-16)	4	1	1915	100	-64.32	171.82	1.30 Passed through belt of pack ice
Aurora (14-16)	14	3	1916	1600	-63.79	157.66	Left Pack Ice
Discovery	3	1	1902	1200	-65.96	178	Numerous bits of drift ice
Terra Nova (03-04)	26	12	1903	2400	-66.8	-179.43	Steaming through pack ice
Terra Nova (03-04)	2	3	1904		-63.8	172.2	Clear water, passed quantities of ice
Aurora (11-14)	30	12	1911	1000	-64.6163	156.143	2.15 Ice ahead, 2.30 passing small ice and occasional icebergs
Aurora (11-14)	31	12	1911	1400	-65.52	155.79	Passed out of drift, passing occasional drift ice and icebergs
Aurora (11-14)	1	1	1912	1000	-65.48	153.72	In open water skirting pack ice all watch
Aurora (11-14)	2	1	1912	2300	-65.5125	147.785	1.10 Clear of pack
Aurora (11-14)	20	1	1912	730	-66.0675	139.8	10.30 Encountered pack ice
Aurora (11-14)	24	1	1912	800	-65.23	132.48	Pack on starboard hard
Aurora (11-14)	29	1	1912	2230	-64.9688	126.881	2.30 Brash Ice
Aurora (11-14)	31	1	1912	1600	-65.965	119.925	10.00 Entered loose pack
Aurora (11-14)	2	1	1912	2400	-64.88	115.24	4.00 Brash Ice
Aurora (11-14)	2	2	1912	400	-64.93	114.52	8.00 Drift ice and occasional brash
Aurora (11-14)	2	2	1912	2400	-65.19	111.44	4PM Open Water
Aurora (11-14)	4	2	1912	1700	-65.51	109.36	Cleared Pack Ice
Aurora (11-14)	5	2	1912	1200	-65.29	107.29	In Pack Ice
Aurora (11-14)	6	2	1912	800	-64.67	106.515	6.00 Open water standing along pack to N
Aurora (11-14)	8	2	1912	1000	-64.18	99.35	3.00 No pack visible during watch, passing numerous icebergs
Aurora (11-14)	22	2	1912	1400	-64.45	95.75	Drift and icebergs getting lighter
Aurora (11-14)	12	1	1913	100	-65.4425	146.403	Open Water
Aurora (11-14)	31	1	1913	700	-67.1275	144.94	21.00 Pack ice on port bow
Aurora (11-14)	10	2	1913	1400	-66.06	142.76	4.00 Passing numbers of icebergs and a little drift ice, encountered line of heavy pack ice
Aurora (11-14)	14	2	1913	2000	-64.55	132.97	No Ice since 6am
Aurora (11-14)	15	2	1913	2400	-64.69	123.73	16.00 Passing occasional pieces of drift ice
Aurora (11-14)	16	2	1913	1200	-64.69	123.73	Midnight. No Ice sighted during watch
Aurora (11-14)	19	2	1913	1800	-63.87	100.1	Noon. Skirting pack ice to NE throughout
Aurora (11-14)	19	2	1913	2200	-63.78	99.63	1600 Skirting pack ice to NW untill 10PM
Aurora (11-14)	20	2	1913	200	-63.69	99.17	1600 Skirting pack ice to NW untill 10PM
Aurora (11-14)	20	2	1913	1800	-63.32	97.33	Noon. Pack Ice to S.
Aurora (11-14)	21	2	1913	200	-63.3	96.96	Open Water
Aurora (11-14)	20	2	1913	500	-63.285	96.69	19.00 Working along pack ice edge
Aurora (11-14)	22	2	1913	1400	-64.14	95.26	8.0 More Open Water
Aurora (11-14)	22	2	1913	1900	-64.42	95.2675	13.0 Open water and snow taking off. Scattered bergs and drift ice about
Aurora (11-14)	23	2	1913	1000	-65.78	95.09	Open water throughout watch, no bergs passed. Occasional drift ice
Aurora (11-14)	24	2	1913	600	-65.73	94.93	Open water throughout
Aurora (11-14)	24	2	1913	2200	-64.69	94.83	Entered loose pack ice
Aurora (11-14)	25	2	1913	1700	-63.6225	94.6975	7.00 Open water
Aurora (11-14)	10	12	1913	500	-62.49	151.19	Passed several small pieces of drift ice
Aurora (11-14)	10	12	1913	2200	-63.87	150	Noon. Passing occasional icebergs and pieces of drift ice
Aurora (11-14)	12	12	1913	2130	-66.0962	145.504	11.30 Reached open water
Aurora (11-14)	2	1	1914	2100	-65.825	136.113	11.00 Came up with pack ice
Aurora (11-14)	3	1	1914	600	-65.43	136.58	20.00 Skirting pack ice
Aurora (11-14)	3	1	1914	1000	-65.24	136.12	Midnight. Following trend of pack ice
Aurora (11-14)	3	1	1914	1800	-64.84	135.21	Skirting pack ice throughout
Aurora (11-14)	3	1	1914	2000	-64.65	134.77	Noon. Pack Edging ship away to N.
Aurora (11-14)	4	1	1914	600	-64.5	133.78	Making way through brash ice till 10pm
Aurora (11-14)	4	1	1914	2200	-64.29	132.205	14.00 Clear of pack
Aurora (11-14)	5	1	1914	1600	-64.19	130.45	Following course of pack
Aurora (11-14)	6	1	1914	1600	-64.51	127.6	Keeping along edge of pack ice to W
Aurora (11-14)	7	1	1914	2000	-64.57	125.92	Skirting Pack Ice
Aurora (11-14)	9	1	1914	800	-65.27	121.93	Midnight. Pack Ice lying to SE
Aurora (11-14)	10	1	1914	400	-65.19	119.44	20.0 Keeping in touch with line of pack ice
Aurora (11-14)	11	1	1914	400	-64.66	115.76	2000 Standing along edge of pack to W
Aurora (11-14)	11	1	1914	1600	-64.8	113.86	8.00 Follwing line of pack ice
Aurora (11-14)	12	1	1914	800	-64.73	111.03	Midnight. Keeping along trend of pack ice.
Aurora (11-14)	12	1	1914	2400	-64.55	108.11	16.00 Keeping along from point to point of pack ice
Aurora (11-14)	16	1	1914	1630	62.968	96.0065	10.30 Entered pack ice
Aurora (11-14)	17	1	1914	430	62.8021	95.6021	22.30 Cleared Pack Ice
Aurora (11-14)	18	1	1914	500	62.9573	94.1569	23.00 Pack Ice ahead to S.
Aurora (11-14)	18	1	1914	1000	63.2333	93.7056	4.00 Pack Ice to S
Aurora (11-14)	18	1	1914	1400	63.4542	93.3444	8.00 Skirting Pack Ice
Aurora (11-14)	19	1	1914	500	64.2747	91.6771	23:00 Making way through scattered pack ice
Aurora (11-14)	22	1	1914	2000	66.441	92.5417	14.15 Left Flow Ice and Stood N.
Aurora (11-14)	29	1	1914	1500	64.9083	96.0021	9.15 Left flow ice
Aurora (11-14)	3	2	1914	1800	63.9083	96.5833	11.45 Reached Open Water
Aurora (11-14)	4	2	1914	800	65.3056	92.6611	2.00 Skirting scatterd Pack throughout
Aurora (11-14)	6	2	1914	2400	64.8625	90.2917	18.00 Clear of all pack
Pourquoi-Pas IV	22	1	1909	1500	-68.3333	-70.4833	On the edge of the pack.
Pourquoi-Pas IV	23	1	1909	500	-67.9667	-69.2	Some drift ice ribbons
Pourquoi-Pas IV	23	1	1909	730	-67.8333	-68.8333	Open sea.
Pourquoi-Pas IV	31	1	1909	200	-67.3333	-69.4833	Pack to the west. 240 icebergs in view.
Pourquoi-Pas IV	1	2	1909	700	-66.9167	-67.1667	Open sea
Pourquoi-Pas IV	1	2	1909	1500	-66.7833	-67.4167	Drift ice very loose.
Pourquoi-Pas IV	23	12	1909	1200	-62.9167	-58.25	Loose pack which extends to land at Joinville.
Pourquoi-Pas IV	24	12	1909	2200	-62.3	-56.75	Along the pack.
Pourquoi-Pas IV	10	1	1910	1100	-68.9167	-74.5	At 3am, iceberg to the east, then iceblocks, then edge of the pack ice.
Pourquoi-Pas IV	10	1	1910	1300	-68.9167	-74.5333	At the edge of the pack. Icebergs.
Pourquoi-Pas IV	10	1	1910	1500	-69	-75.0167	At the edge of the pack. Icebergs.
Pourquoi-Pas IV	10	1	1910	1700	-69.0833	-75.5	At the edge of the pack. Icebergs.
Pourquoi-Pas IV	10	1	1910	1900	-69.1167	-75.9833	At the edge of the pack. Icebergs.
Pourquoi-Pas IV	10	1	1910	2300	-69.1833	-76.4667	At the edge of the pack. Icebergs.
Pourquoi-Pas IV	11	1	1910	100	-69.1833	-76.4667	At the edge of the pack. Icebergs.
Pourquoi-Pas IV	11	1	1910	300	-69.1833	-76.4667	At the edge of the pack. Icebergs.
Pourquoi-Pas IV	11	1	1910	500	-69.1833	-76.4667	At the edge of the pack. Icebergs.
Pourquoi-Pas IV	11	1	1910	1500	-69.2	-76.2167	At the edge of the pack. Icebergs.
Pourquoi-Pas IV	11	1	1910	1700	-69.2667	-76.6167	At the edge of the pack. Icebergs.
Pourquoi-Pas IV	11	1	1910	1900	-69.35	-77.0167	At the edge of the pack. Icebergs.
Pourquoi-Pas IV	11	1	1910	2100	-69.45	-77.4167	At the edge of the pack. Icebergs.
Pourquoi-Pas IV	11	1	1910	2300	-69.55	-77.8167	At the edge of the pack. Icebergs.
Pourquoi-Pas IV	12	1	1910	100	-69.6667	-78.1667	At the edge of the pack. Icebergs.
Pourquoi-Pas IV	12	1	1910	200	-69.8167	-78.2	At the edge of the pack. Icebergs.
Pourquoi-Pas IV	12	1	1910	400	-69.9833	-78.3333	At the edge of the pack. Icebergs.
Pourquoi-Pas IV	12	1	1910	600	-70.15	-78.5333	At the edge of the pack. Icebergs.
Pourquoi-Pas IV	12	1	1910	1000	-70.0833	-78.7833	At the edge of the pack. Icebergs.
Pourquoi-Pas IV	12	1	1910	1400	-70.0667	-79.6667	Cluster of very large icebergs at the edge of the pack ice.
Pourquoi-Pas IV	12	1	1910	1600	-70.0833	-80.4667	At the edge of the pack. Icebergs.
Pourquoi-Pas IV	12	1	1910	1800	-70.1167	-81.0333	At the edge of the pack. Icebergs.
Pourquoi-Pas IV	12	1	1910	2000	-70.1	-81.8333	At the edge of the pack. Icebergs.
Pourquoi-Pas IV	12	1	1910	2200	-70.0667	-82.6667	At the edge of the pack. Icebergs.
Pourquoi-Pas IV	13	1	1910	400	-69.6167	-83.2	At the edge of the pack. Icebergs.
Pourquoi-Pas IV	13	1	1910	600	-69.4833	-83.45	At the edge of the pack. Icebergs.
Pourquoi-Pas IV	13	1	1910	800	-69.4833	-84.25	At the edge of the pack. Icebergs.
Pourquoi-Pas IV	13	1	1910	1000	-69.4833	-85	At the edge of the pack. Icebergs.
Pourquoi-Pas IV	13	1	1910	1200	-69.3333	-85.6667	At the edge of the pack. Icebergs.
Pourquoi-Pas IV	13	1	1910	1400	-69.2	-86.3333	At the edge of the pack. Icebergs.
Pourquoi-Pas IV	13	1	1910	1600	-69.1667	-86.4167	At the edge of the pack. Icebergs.
Pourquoi-Pas IV	13	1	1910	1800	-69.0333	-86.5	At the edge of the pack. Icebergs.
Pourquoi-Pas IV	14	1	1910	400	-68.6167	-88.35	Many icebergs outside the pack.
Pourquoi-Pas IV	15	1	1910	1500	-68.7333	-96.8667	At the edge of the pack ice. Icebergs.
Pourquoi-Pas IV	15	1	1910	1700	-68.85	-97.15	At the edge of the pack ice. 20 icebergs.
Pourquoi-Pas IV	16	1	1910	100	-69.3167	-97.25	76 icebergs in view. Some bands of drift ice.
Pourquoi-Pas IV	16	1	1910	300	-69.4167	-98.5	76 icebergs in view. Some bands of drift ice.
Pourquoi-Pas IV	16	1	1910	500	-69.3167	-99.8	Very many icebergs in view. Some bands of pack.
Pourquoi-Pas IV	16	1	1910	900	-69.3	-100.167	Very many icebergs in view. Some bands of pack.
Pourquoi-Pas IV	16	1	1910	2300	-69.0333	-101.467	At the edge of the pack ice. Icebergs.
Pourquoi-Pas IV	17	1	1910	100	-69.0667	-101.767	At the edge of the pack ice. Icebergs.
Pourquoi-Pas IV	17	1	1910	300	-69.0833	-102.067	At the edge of the pack ice. Icebergs.
Pourquoi-Pas IV	17	1	1910	500	-69.1	-102.383	At the edge of the pack ice. Icebergs.
Pourquoi-Pas IV	17	1	1910	700	-69.2	-102.767	At the edge of the pack ice. Icebergs.
Pourquoi-Pas IV	17	1	1910	900	-69.3	-103.15	At the edge of the pack ice. Icebergs.
Pourquoi-Pas IV	17	1	1910	1100	-69.4	-103.533	At the edge of the pack ice. Icebergs.
Pourquoi-Pas IV	17	1	1910	1300	-69.4833	-103.917	At the edge of the pack ice. Icebergs.
Pourquoi-Pas IV	17	1	1910	1500	-69.5833	-104.3	At the edge of the pack ice. Icebergs.
Pourquoi-Pas IV	17	1	1910	1700	-69.4667	-105	At the edge of the pack ice. Icebergs.
Pourquoi-Pas IV	17	1	1910	2100	-69.3	-105.417	At the edge of the pack ice. Icebergs.
Pourquoi-Pas IV	17	1	1910	2300	-69.1	-105.383	At the edge of the pack ice. Icebergs.
Pourquoi-Pas IV	18	1	1910	100	-69.1	-105.667	At the edge of the pack ice. Icebergs.
Pourquoi-Pas IV	18	1	1910	300	-69.1667	-105.717	At the edge of the pack ice. Icebergs.
Pourquoi-Pas IV	18	1	1910	500	-69.25	-105.783	At the edge of the pack ice. Icebergs.
Pourquoi-Pas IV	18	1	1910	700	-69.4167	-106.283	At the edge of the pack ice. Icebergs.
Pourquoi-Pas IV	18	1	1910	800	-69.4167	-106.283	At the edge of the pack ice.
Pourquoi-Pas IV	18	1	1910	1200	-69.7833	-107	At the edge of the pack ice. Some icebergs.
Pourquoi-Pas IV	18	1	1910	1400	-69.9833	-107.317	At the edge of the pack ice.
Pourquoi-Pas IV	18	1	1910	1600	-70.1667	-107.633	At the edge of the pack ice.
Pourquoi-Pas IV	18	1	1910	1800	-70.2667	-108	At the edge of the pack ice.
Pourquoi-Pas IV	18	1	1910	2000	-70.3667	-108.667	At the edge of the pack ice.
Pourquoi-Pas IV	18	1	1910	2200	-70.3	-109.167	At the edge of the pack ice.
Pourquoi-Pas IV	19	1	1910	0	-69.9167	-109.75	At the edge of the pack ice.
Pourquoi-Pas IV	19	1	1910	200	-69.8333	-109.617	At the edge of the pack ice.
Pourquoi-Pas IV	19	1	1910	400	-69.7167	-109.467	At the edge of the pack ice.
Pourquoi-Pas IV	19	1	1910	600	-69.6167	-109.467	At the edge of the pack ice.
Pourquoi-Pas IV	19	1	1910	800	-69.5	-109.467	At the edge of the pack ice.
Pourquoi-Pas IV	19	1	1910	1000	-69.3667	-109.383	At the edge of the pack ice.
Pourquoi-Pas IV	19	1	1910	1200	-69.2333	-109.3	At the edge of the pack ice.
Pourquoi-Pas IV	21	1	1910	600	-70.0833	-118.833	At the edge of the pack ice.
Gauss	15	2	1902		-63.87	95.53
Gauss	16	3	1903		-63.87	83.32
Belgica	1	3	1898		-69.67	-80.5
Belgica	1	3	1899		-71.6	-96.67
