# Supplementary material for: Estimating the extent of Antarctic summer sea ice during the Heroic Age of Antarctic Exploration
Source: Copernicus journal article supplement (doi:10.5194/tc-10-2721-2016), 2016-11-21
Supplement: Supplementary file 1 [file tc-10-2721-2016-supplement.zip]

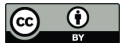

## *Supplement of*

# **Estimating the extent of Antarctic summer sea ice during the Heroic Age of Antarctic Exploration**

**Tom Edinburgh and Jonathan J. Day**

*Correspondence to:* Jonathan J. Day (j.j.day@reading.ac.uk)

- tc-10-2721-2016-supplement-title-page.pdf
- tc-2016-90-supplement-version3
  - tc-2016-90-supplement\_new
    - \* .DS\_Store
    - \* Video S1, Scotia 02-03.avi
    - \* Video S2, Scotia 03-04.avi
    - \* Video S3, Endurance 14-17.avi
    - \* Video S4, Nimrod 07-08.avi
    - \* Video S5, Nimrod 08-09.avi
    - \* Video S6, Terra Nova 10-11.avi
    - \* Video S7, Terra Nova 11-12.avi
    - \* Video S8, Terra Nova 12-13.avi
    - \* Video S9, Aurora 14-16.avi
    - \* article\_supplementary\_material\_final.pdf
    - \* ice\_edge\_points.xlsx

The copyright of individual parts of the supplement might differ from the CC-BY 3.0 licence.
